# Supplementary material for: Transcriptomic signals of mitochondrial dysfunction and OXPHOS dynamics in fast-growth chicken
Source: PeerJ journal article supplement (doi:10.7717/peerj.13364), 2022-05-04
Supplement: FigureS1-50VarGenes.pdf [file FigureS1-50VarGenes.pdf]

### Color Key and Histogram

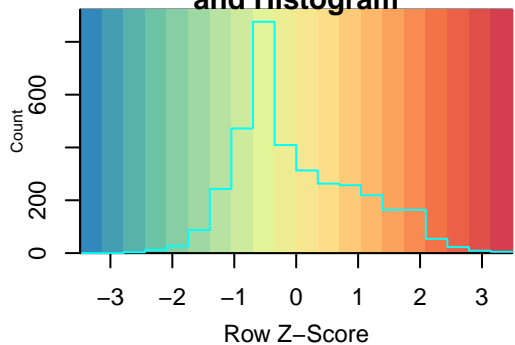

## Top 50 most variable genes across samples

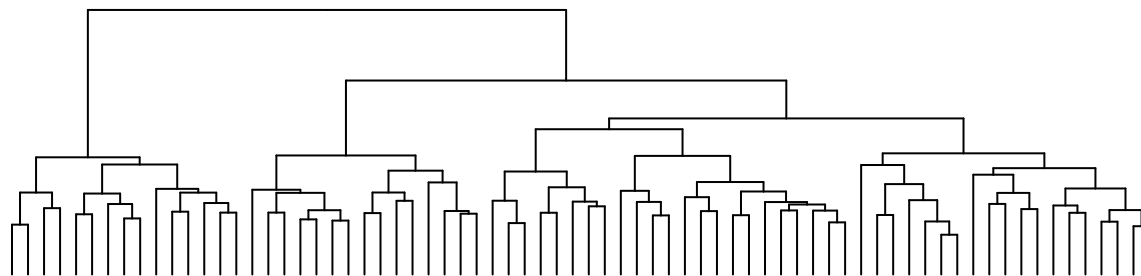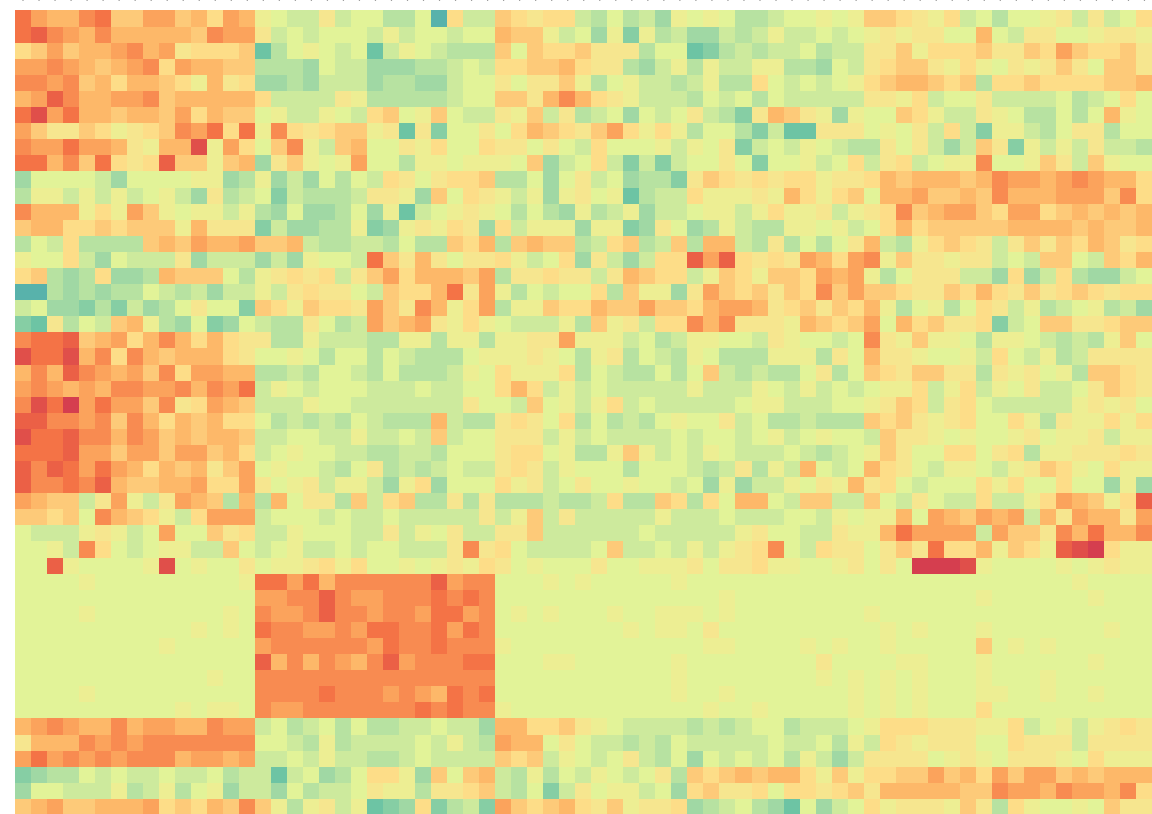

ENSGALG00000022674  
ENSGALG00000012783  
ENSGALG00000027638  
ENSGALG00000006112  
ENSGALG00000000313  
ENSGALG00000014545  
ENSGALG00000023622  
ENSGALG00000027583  
ENSGALG00000028273  
ENSGALG00000015358  
ENSGALG00000024011  
ENSGALG00000012541  
ENSGALG00000007463  
ENSGALG00000013312  
ENSGALG00000027107  
ENSGALG00000023435  
ENSGALG00000026209  
ENSGALG00000004044  
ENSGALG00000008805  
ENSGALG00000009748  
ENSGALG00000004772  
ENSGALG00000022685  
ENSGALG00000026748  
ENSGALG00000013045  
ENSGALG00000006491

RD42L  
RD42O  
RD42A  
RD42J  
RD42D  
RD42P  
RD42K  
RD42H  
WD42O  
WD42F  
WD42N  
WD11R  
WD42B  
WD11I  
WD11C  
RD42N  
RD42I  
WD42I  
WD42A  
WD42Q  
WD42C  
WD11Q  
WD11B  
WD11P  
WD11F  
WD11M  
WD11A  
RD11C  
RD11N  
RD11B  
RD11J  
RD11M  
RD11D  
RD11K  
RD11H  
RD11F
