# Supplementary material for: Transcriptomic signals of mitochondrial dysfunction and OXPHOS dynamics in fast-growth chicken
Source: PeerJ journal article supplement (doi:10.7717/peerj.13364), 2022-05-04

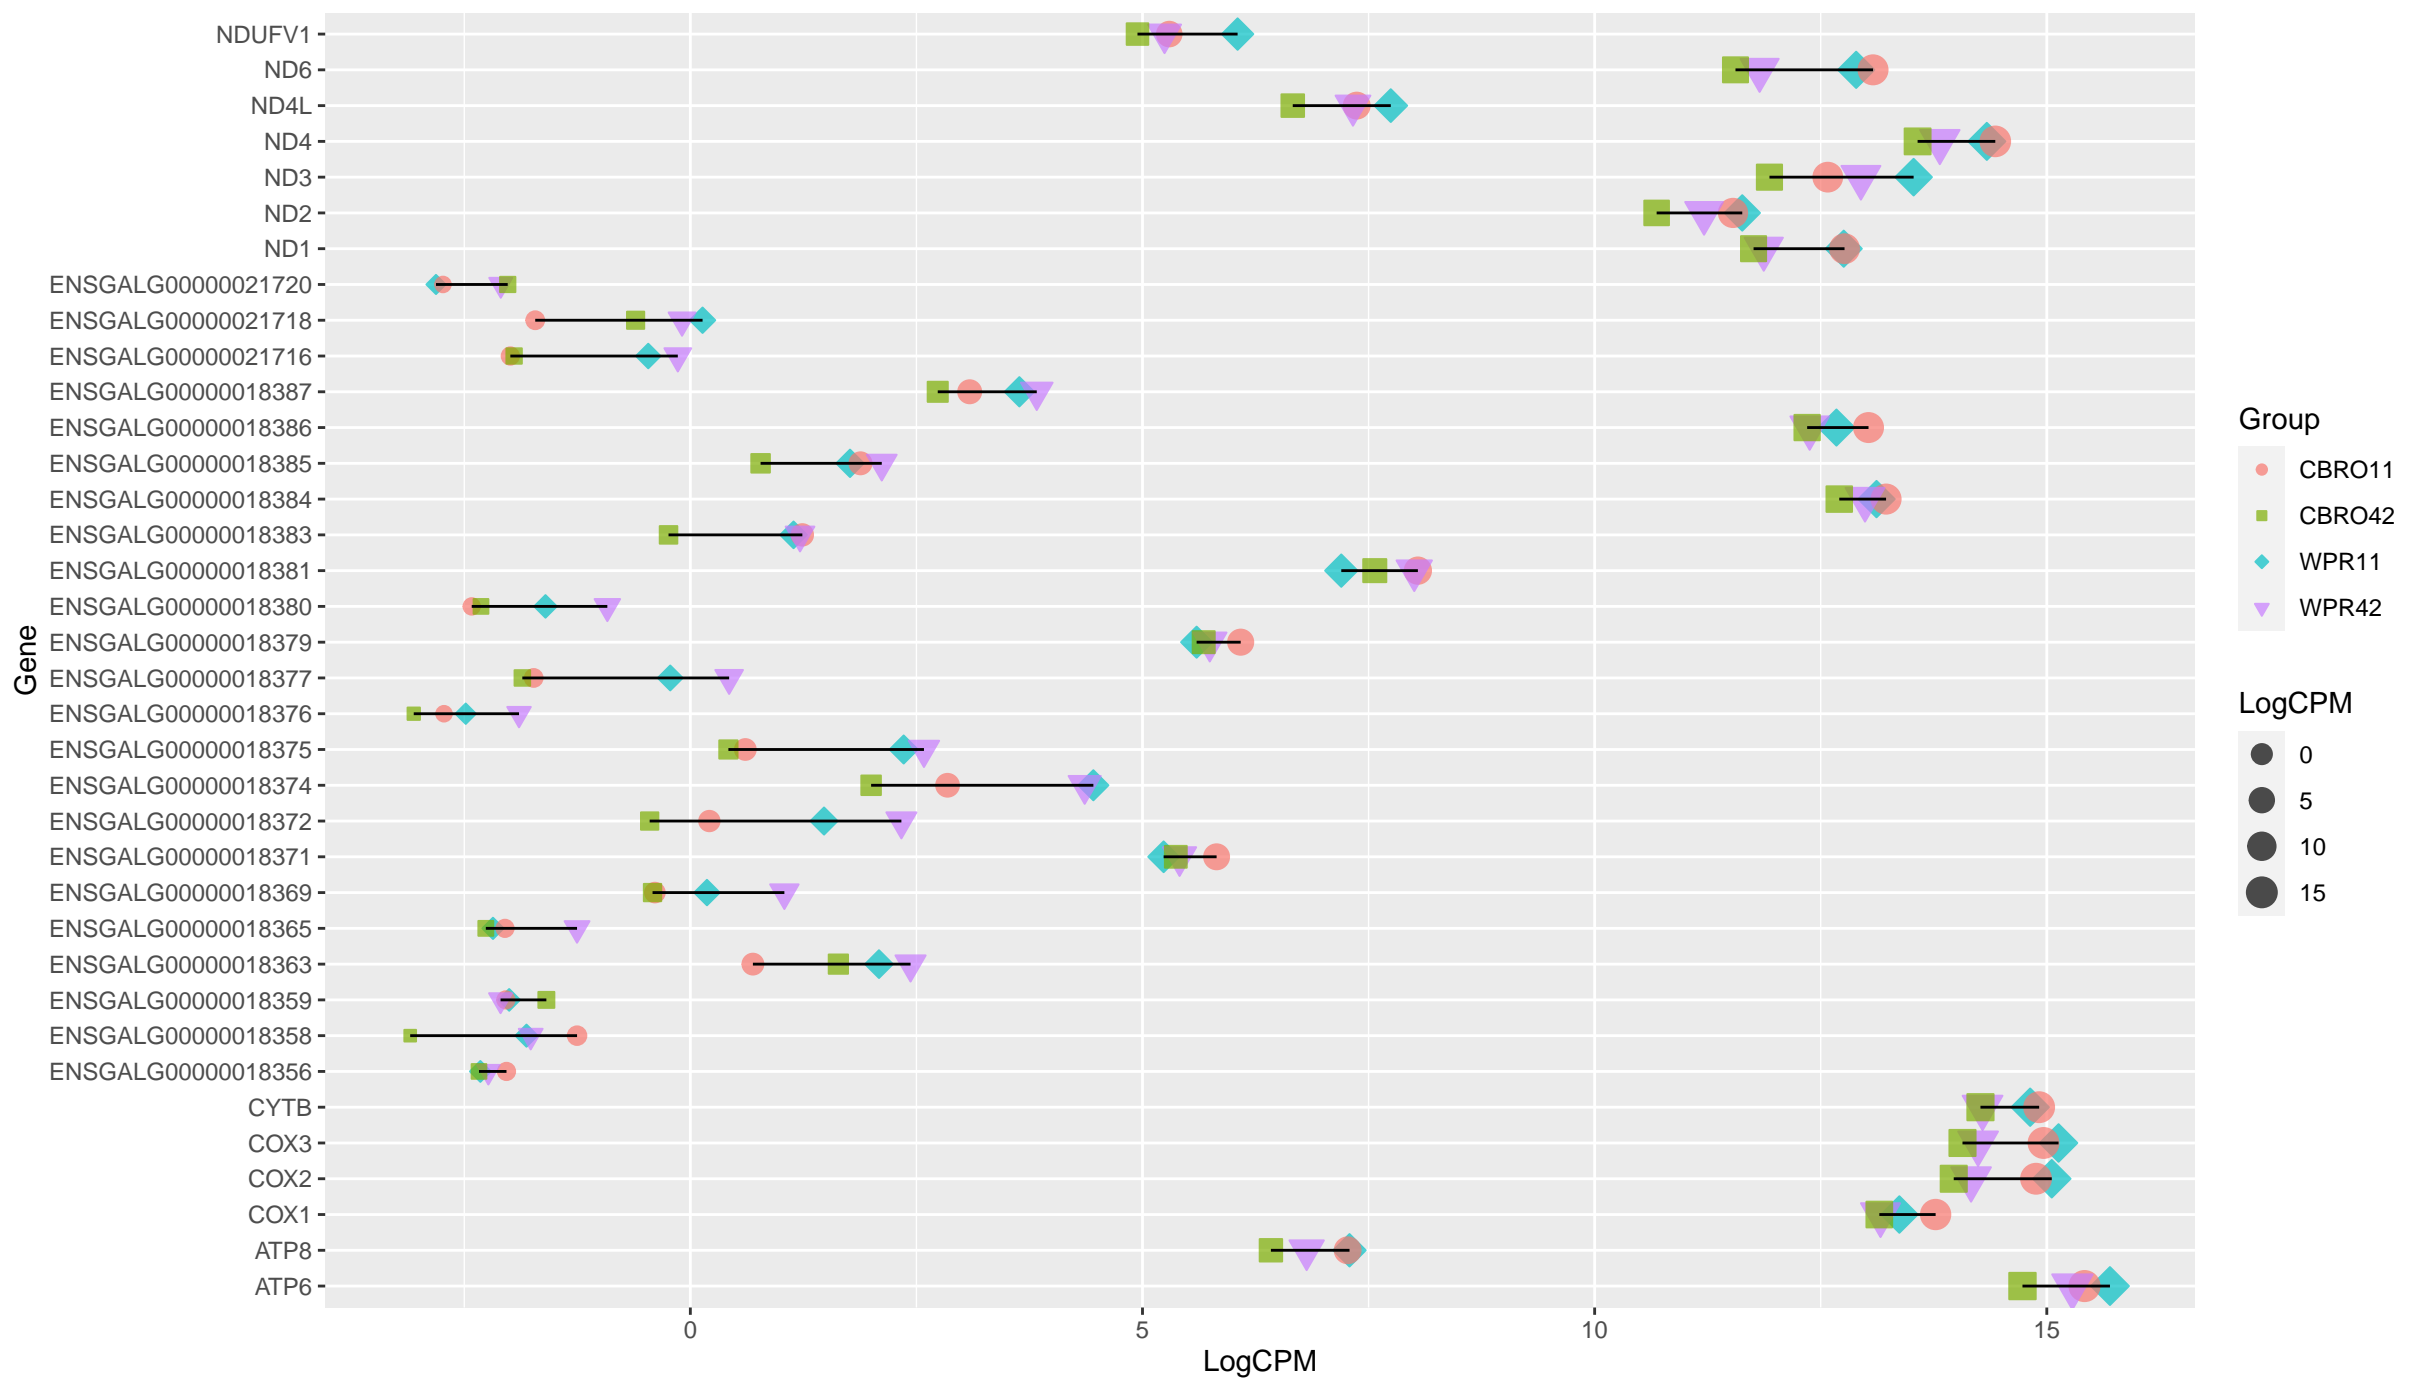

Supplement: FigureS2-mtGenesCLplot.pdf [file FigureS2-mtGenesCLplot.pdf]
